# Supplementary material for: Manganese dioxide nanoparticles incorporated within ionic liquid derived fibrillated mesoporous carbon: electrode material for high-performance supercapacitors
Source: Royal Society of Chemistry journal article supplement (doi:10.1039/c5ra16923b), 2015-01-01
Supplement: c5ra16923b1.pdf [file c5ra16923b1.pdf]

## Supplementary information

### **Manganese Dioxide Nanoparticles Incorporated within Ionic Liquid Derived Fibrillated Mesoporous Carbon: Electrode Material for High-Performance Supercapacitors**

*Sayed Habib Kazemi <sup>\*,a,b</sup>, Babak Karimi <sup>\*,a</sup>, Armin Fashi <sup>a</sup>, Hesam Behzadnia <sup>a</sup>, Hojjatollah Vali <sup>c</sup>*

*<sup>a</sup> Department of Chemistry, Institute for Advanced Studies in Basic Sciences (IASBS) Zanzan 45137-66731 (Iran)*

*<sup>b</sup> Center for Research in Climate Change and Global Warming (CRCC), Institute for Advanced Studies in Basic Sciences (IASBS), Zanzan 45137-66731, Iran*

*<sup>c</sup> Department of Anatomy and Cell Biology and Facility for Electron Microscopy Research, McGill University, 3450 University St. Montreal, Quebec, H3A 0C7 (Canada)*

*E-mail addresses: [habibkazemi@iasbs.ac.ir](mailto:habibkazemi@iasbs.ac.ir) and [karimi@iasbs.ac.ir](mailto:karimi@iasbs.ac.ir)*

#### **Contents:**

Figure S-1: TEM image of pure IFMC

Figure S-2: XPS plot recorded for IFMC

Figure S-3: Capacitance retention plot

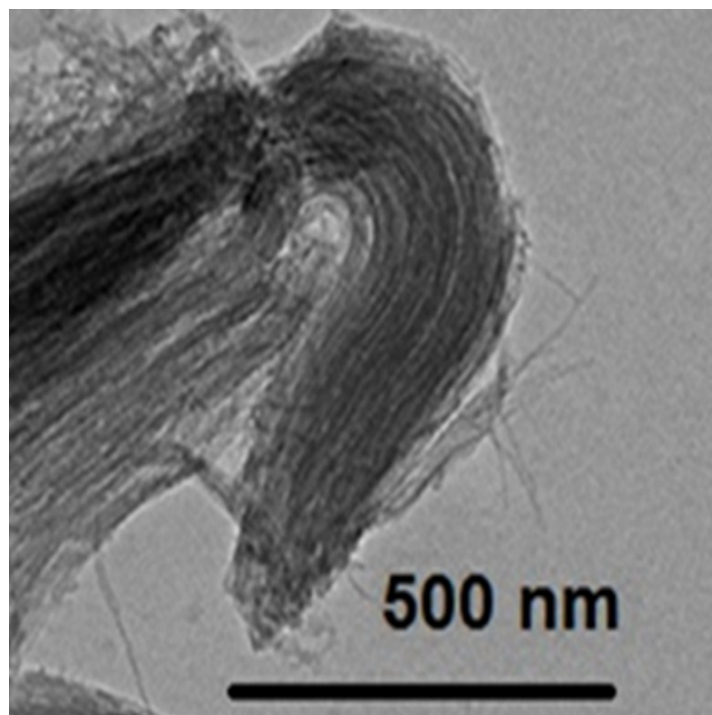

**Figure S-1.** TEM image of pure IFMC substrate

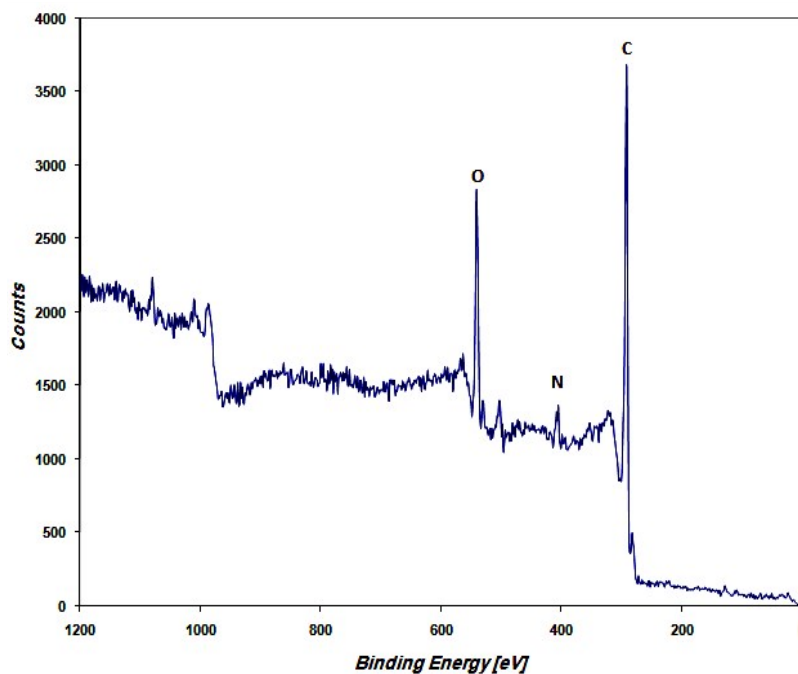

**Figure S-2.** X-ray photoelectron spectrum recorded for ionic liquid derived nano-fibrillated mesoporous carbon (IFMC) electrode material (The signals located at about 285, 403, and 535 eV were assigned to C, N, and O, respectively.)

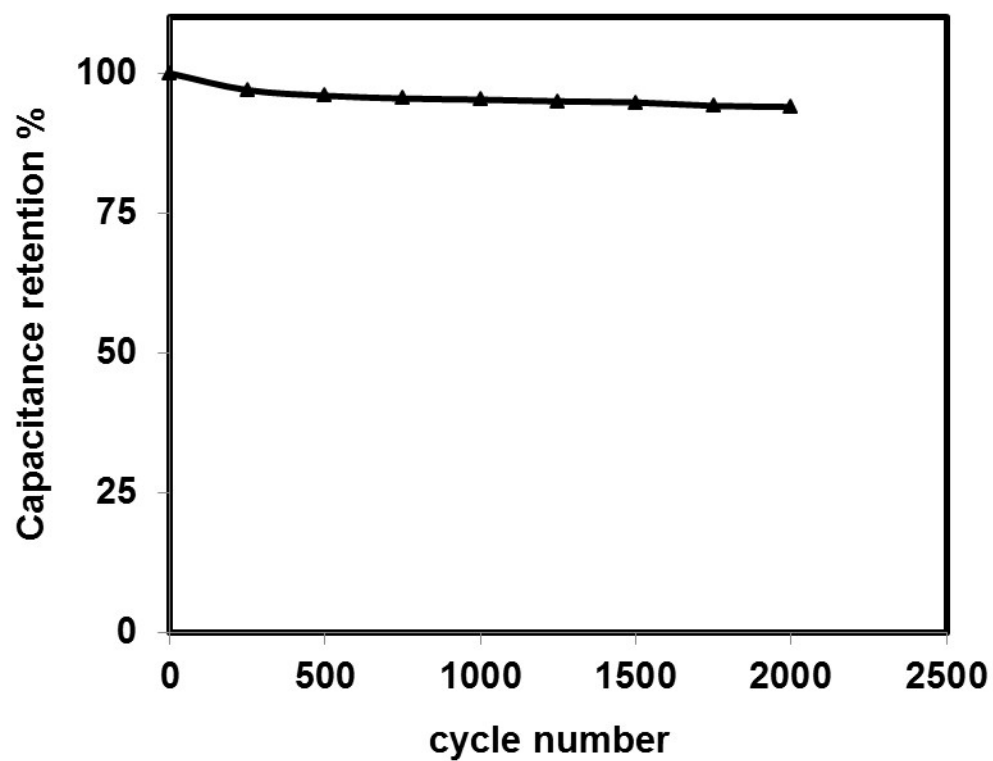

**Figure S-3.** Relative capacitance retention against charge/discharge cycle number for MnO<sub>2</sub>@IFMC supercapacitor
